# Supplementary material
Source: Springer Nature journal article supplement (https://www.springermedizin.de/resource/supplementary/13075_2009_2770_MOESM8_ESM.pdf/9692850)
Supplement: MOESM8 [file 9692850]

**A****In Vitro Mineral Production by MPC**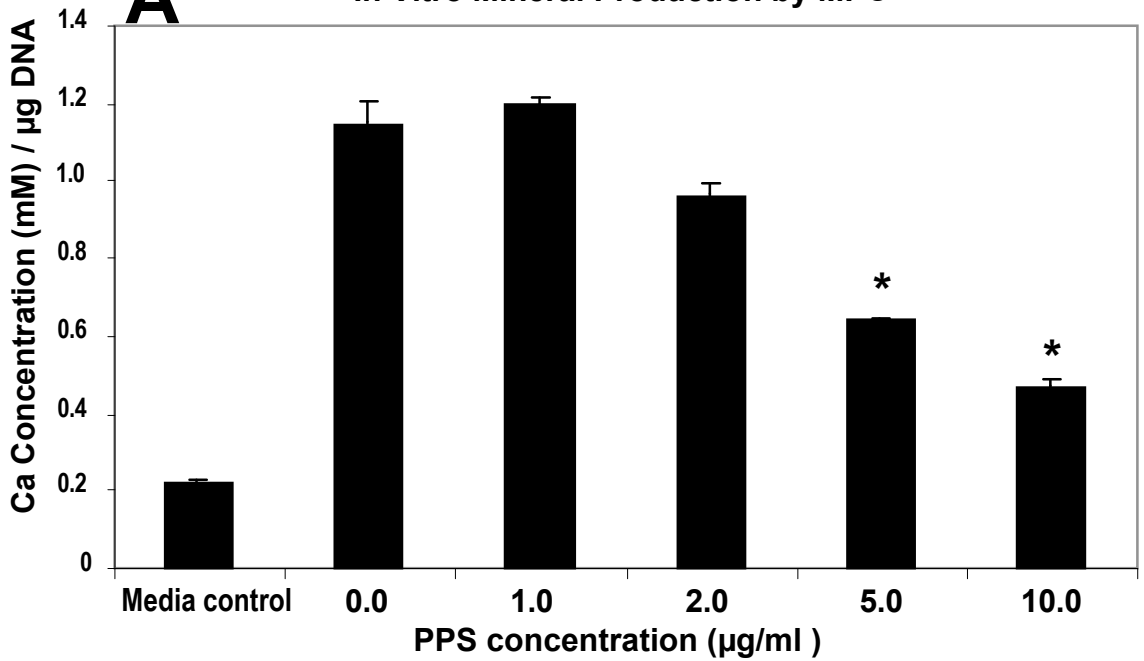**B****Photomicrographs of Osteogenic Cultures**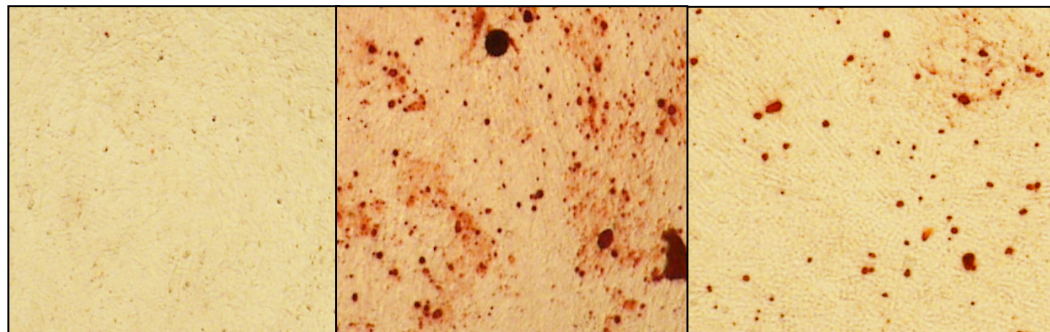

Normal Media

0.0  $\mu\text{g/ml PPS}$ 10  $\mu\text{g/ml PPS}$
